# Supplementary material for: ADA3 regulates normal and tumor mammary epithelial cell proliferation through c-MYC
Source: PubMed Central journal article supplement (PMC5112670; doi:10.1186/s13058-016-0770-9), 2016-11-16
Supplement: 13058_2016_770_MOESM1_ESM.pdf [file 13058_2016_770_MOESM1_ESM.pdf]

Supplementary Figure 1

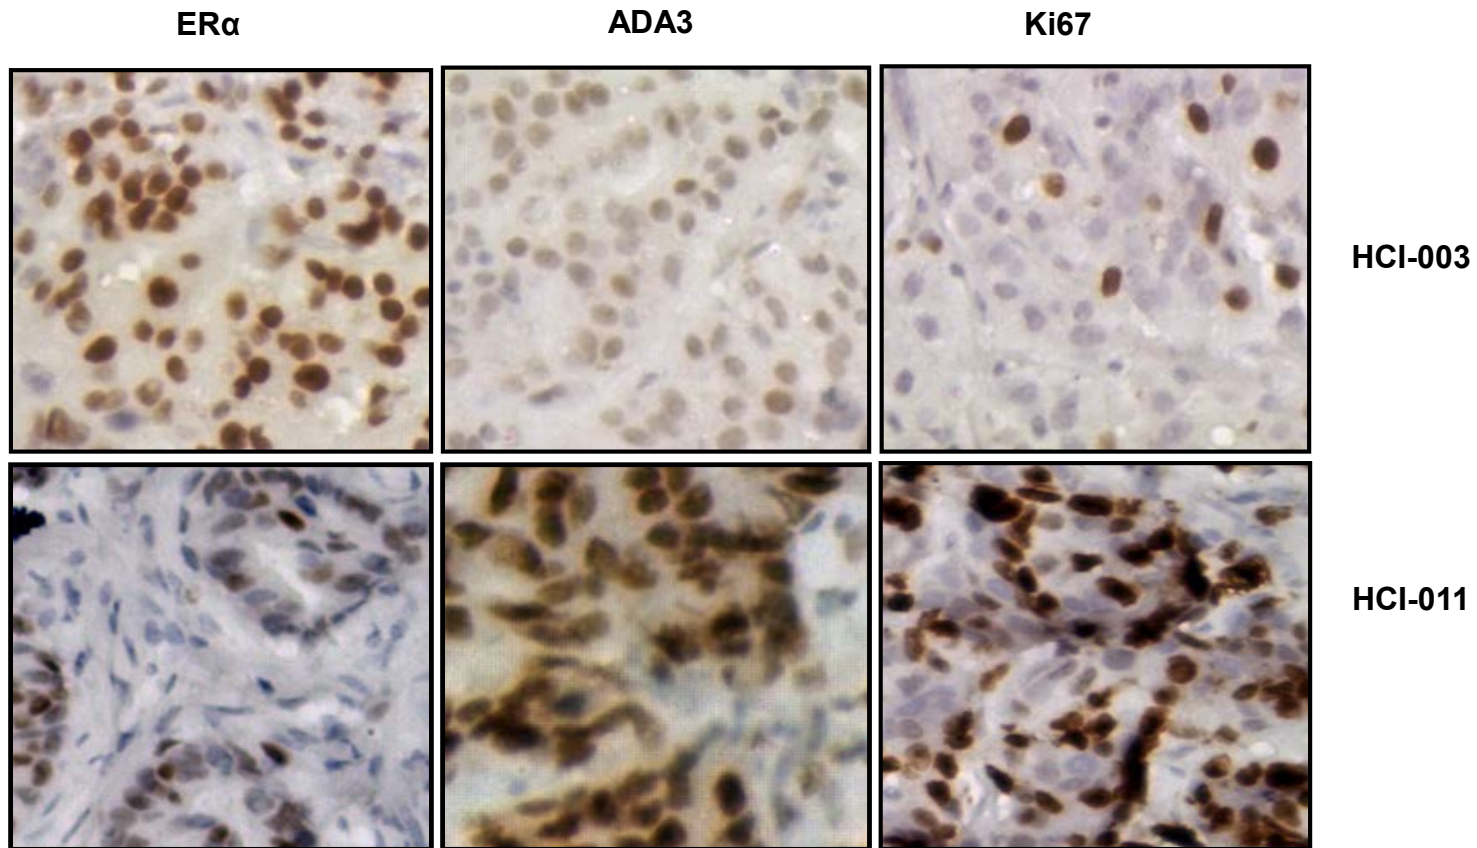

**Figure S1. High ADA3 expression in patient derived xenografts correlates with elevated Ki67.** A representative of two ER+ /PR+ tumor grafts from two different breast cancer patients (HCI-003 and HCI-011). Patient-derived xenografts (as described in DeRose et al ., 2011) were sectioned and stained with antibodies indicated (brown staining). Blue staining is hematoxylin.

A.

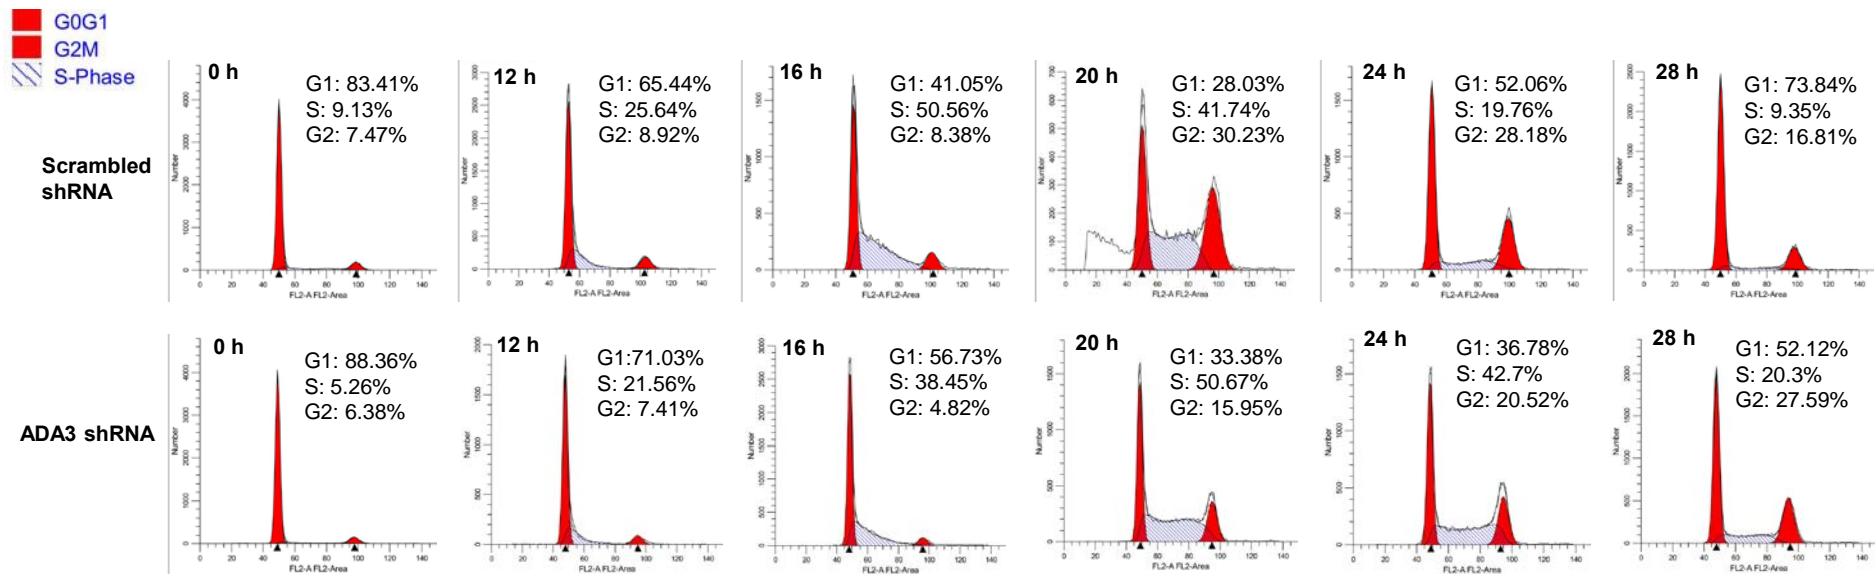

B.

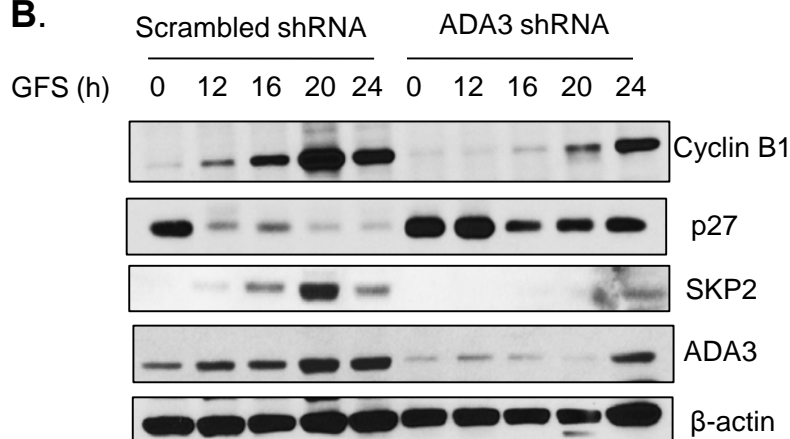

C.

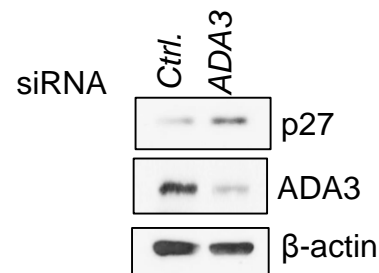

**Figure S2. Knockdown of ADA3 causes a delay in cell cycle progression in immortal hMECs.** 76N-TERT cells expressing scrambled shRNA or Ada3 shRNA were deprived of growth factors in DFCI-3 media for 72hrs, then released from synchrony by adding growth factor containing DFCI-1 medium. Cells were then collected at the indicated time points for various analyses. **(A)** FACS analysis after propidium iodide staining. Cell cycle profile (G1/S/G2/M) at selected time points is shown **(B)** Lysates were immunoblotted with indicated antibodies. β-actin was used as a loading control. **(C)** Lysates from 76N-TERT transfected with ctrl. or ADA3 siRNA were immunoblotted with indicated antibodies.

### Supplementary Figure 3

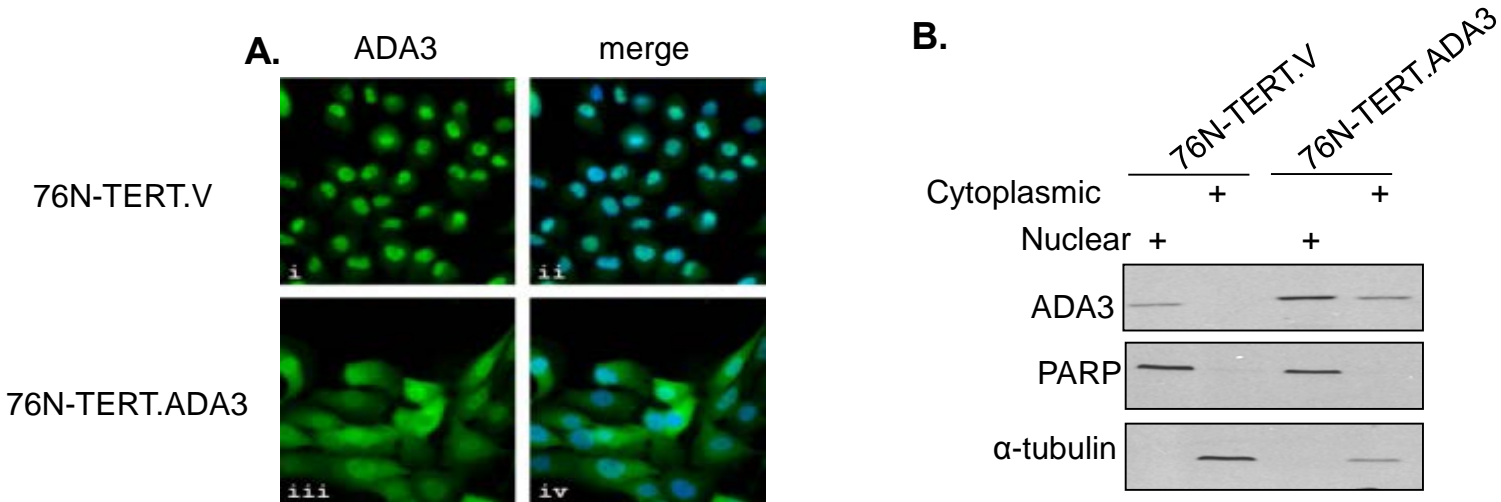

**Figure S3: Exogenous overexpression of ADA3 in Human Mammary Epithelial Cells.** Endogenous expression of ADA3 in 76N-TERT cells is only nuclear but after overexpression of ADA3, expression is observed in both nucleus and cytoplasm. **(A)** 76N-TERT.V (i and ii) or 76N-TERT.ADA3 cells (iii and iv) stained for ADA3. **(B)** ADA3 protein levels after biochemical fractionation, PARP and  $\alpha$ -tubulin are used as nuclear and cytoplasmic control, respectively.

## Supplementary Figure 4

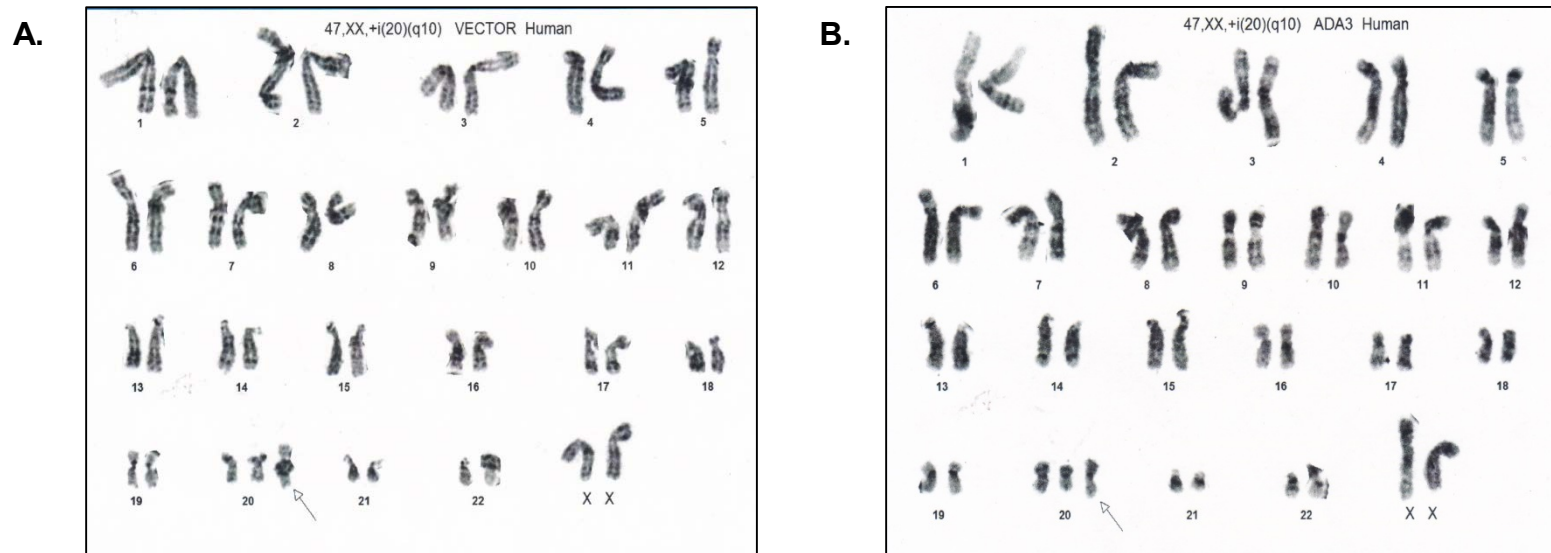

**Figure S4: ADA3 overexpression does not alter chromosomal stability.** **A)** Representative karyotype of 76N-TERT vector cells and **B)** representative karyotype of 76N-TERT ADA3 cells.

**Table S1. Karyotypic analysis of 76N-TERT vector or ADA3 overexpressing cell lines.**

| 76N-TERT | Total Breaks (in 50 diploid metaphases) | No. of Metaphases scored | Average No. of breaks per metaphase |
|----------|-----------------------------------------|--------------------------|-------------------------------------|
| Vector   | 19                                      | 50                       | 0.38                                |
| ADA3     | 16                                      | 50                       | 0.32                                |

## Supplementary Figure 5

### MCF-7

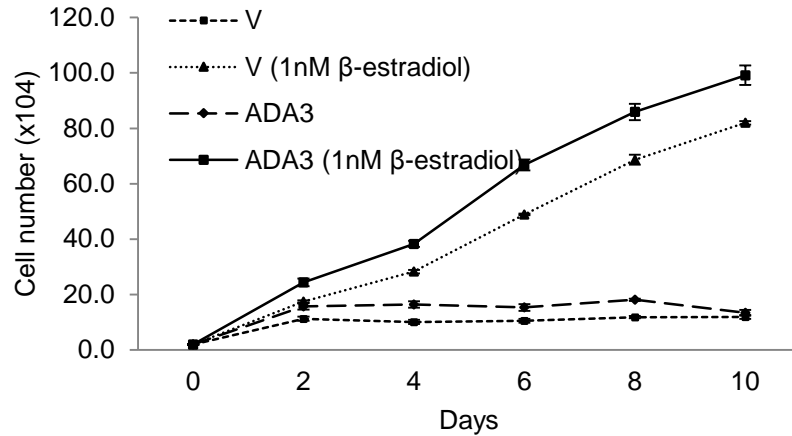

### ZR-75-1

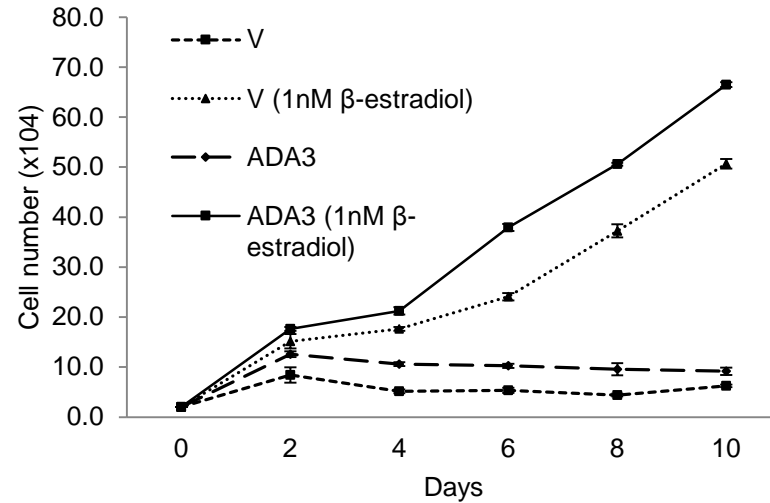

**Figure S5. ADA3 overexpression does not induce estrogen independence for proliferation.** Indicated cell lines overexpressing vector (V) or ADA3 were deprived of estrogen in phenol red-free  $\alpha$ -MEM medium supplemented with 5% charcoal dextran stripped fetal calf serum for 72hrs and stimulated with 1nM of  $\beta$ -estradiol. Fresh medium was added on alternate days and total number of cells were determined using a hemocytometer and trypan blue exclusion method.

## Supplementary Figure 6

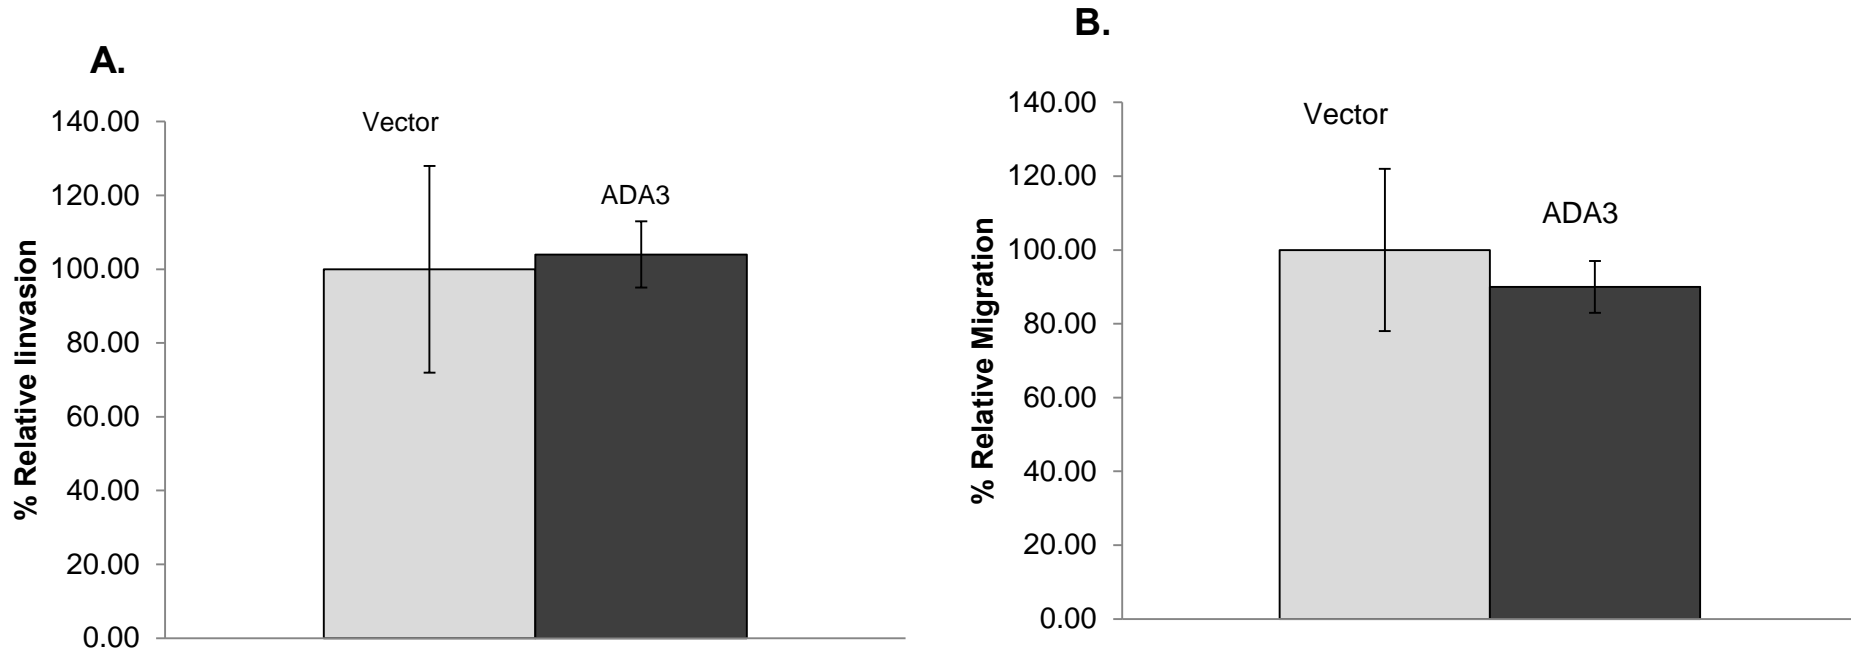

**Figure S6. ADA3 overexpression has no effect on invasion or migration of cells.** ZR-75-1, a ER+ breast cancer cell line expressing vector (V) or ADA3 was examined for changes in invasive (A) or migratory (B) potential using Boyden chamber method.

**Table S2: Survival analysis in the whole cohort**

| Case Processing Summary         |         |                |          |         |
|---------------------------------|---------|----------------|----------|---------|
| ADA3_NUC_CMYC_C<br>OEXPRESSION  | Total N | N of<br>Events | Censored |         |
|                                 |         |                | N        | Percent |
| ADA3 Negative C MYC<br>Negative | 172     | 60             | 112      | 65.1%   |
| ADA3 Positive C MYC<br>Negative | 68      | 11             | 57       | 83.8%   |
| ADA3 Negative C MYC<br>Positive | 177     | 70             | 107      | 60.5%   |
| ADA3 Positive C MYC<br>Positive | 167     | 60             | 107      | 64.1%   |
| Overall                         | 584     | 201            | 383      | 65.6%   |

**Table S3 Survival analysis in the ER+ cohort Only :**

| ADA3_NUC_CMYC_C<br>OEXPRESSION  | Total N | N of<br>Events | Censored |         |
|---------------------------------|---------|----------------|----------|---------|
|                                 |         |                | N        | Percent |
| ADA3 Negative C MYC<br>Negative | 113     | 34             | 79       | 69.9%   |
| ADA3 Positive C MYC<br>Negative | 56      | 9              | 47       | 83.9%   |
| ADA3 Negative C MYC<br>Positive | 120     | 48             | 72       | 60.0%   |
| ADA3 Positive C MYC<br>Positive | 142     | 53             | 89       | 62.7%   |
| Overall                         | 431     | 144            | 287      | 66.6%   |
